# Supplementary material for: Newcastle-disease-virus-induced ferroptosis through nutrient deprivation and ferritinophagy in tumor cells
Source: PubMed Central journal article supplement — iScience. 2021 Jul 10;24(8):102837. doi: 10.1016/j.isci.2021.102837 (PMC8326413; doi:10.1016/j.isci.2021.102837), 2021-07-10
Supplement: mmc1.pdf [file mmc1.pdf]

iScience, Volume 24

## **Supplemental information**

### **Newcastle-disease-virus-induced ferroptosis through nutrient deprivation and ferritinophagy in tumor cells**

**Xianjin Kan, Yuncong Yin, Cuiping Song, Lei Tan, Xusheng Qiu, Ying Liao, Weiwei Liu, Songshu Meng, Yingjie Sun, and Chan Ding**

## Supplemental information

**Table S1. qPCR primers for mRNA validation (Related to STAR METHODS)**

| <b>Genes</b>          | <b>Primer Sequence 5' to 3'</b> |
|-----------------------|---------------------------------|
| P53-qPCR-F            | CGATCCCGGGCAATACAAC             |
| P53-qPCR-R            | TGTGCTGGATGCATCTCTCG            |
| GPX4-qPCR-F           | CAGTGAGGCAAGACCGAAGT            |
| GPX4-qPCR-R           | CCGAACGGTTACACGGGAA             |
| FTH1-qPCR-F           | CTGCGCCCTTCTGGAAAATG            |
| FTH1-qPCR-R           | GCAACCCCAGGATTCAGGA             |
| SLC7A11-qPCR-F        | ACAGGGATTGGCTTCGTCAT            |
| SLC7A11-qPCR-R        | GGCAGATTGCCAAGATCTCAA           |
| SLC3A2-qPCR-F         | ACAGAGTCCTCGGACCTTCA            |
| SLC3A2-qPCR-R         | CCGTAGCTGAAAACAGGGGT            |
| $\beta$ -actin-qPCR-F | GTGGATCAGCAAGCAGGAGT            |
| $\beta$ -actin-qPCR-R | ATCCTGAGTCAAGCGCCAAA            |

**F: Forward; R: Reverse**

**Table S2. qPCR primers for siRNA validation (Related to STAR METHODS)**

| <b>Genes</b> | <b>Primer Sequence 5' to 3'</b> |
|--------------|---------------------------------|
| siRNA-NCOA4  | GGGCUGAACAGCAAUUAATT            |
| siRNA-p53    | CCCGGACGAUUAUGAACAATT           |
| siRNA-ATG5   | GCUAUAUCAGGAUGAGAUATT           |
| siRNA-NC     | UUCUCCGAACGUGUCACGUTT           |

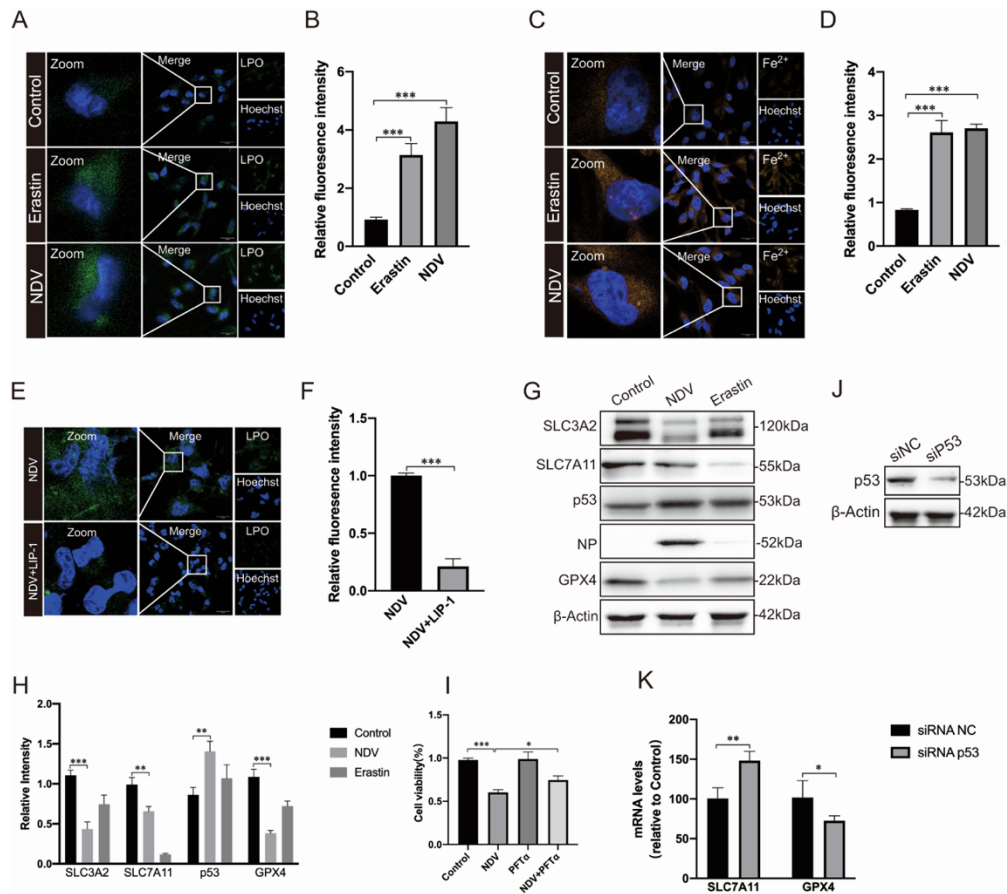

**S1 Fig. NDV (ZJ1 strain) induces ferroptosis via the p53–SLC7A11–GPX4 signaling pathway. Related to Figure 1, Figure 2, Figure 3.**

(A, B) Intracellular LPO in U251 cells treated with or without erastin and NDV (DJ1 strain) for 24 h was determined with the fluorescent probe Liperfluo (Green). Scale bars = 20 μm.

(C, D) Analysis of intercellular ferrous iron levels in U251 cells after erastin and NDV (ZJ-1 strain) treatment for 24 h using the fluorescent probe FerroOrange (Orange). Scale bars = 20 μm.

(E, F) Analysis of intracellular LPO in NDV-infected U251 cells treated with or without LIP-1. Scale bars = 20 μm.

(G, H) Western blotting analyses of the levels of p53, SLC7A11, SLC3A2, GPX4, and NP in U251 cells after ZJ1 strain infection, β-actin was used as the loading control.

(I) Cell death was examined with an LDH assay 24 h after pretreatment with or without PFTα.

(J) P53 expression levels in U251 cells transfected with siRNA-control or siRNA-mediated p53 stable knockdown was determined with western blotting.

(K) mRNA levels of SLC7A11 and GPX4 in U251 cells with p53 knockdown. Cells treated with NDV (MOI = 1) for 24h.

Significance was analyzed using a two-tailed Student's t-test. \*  $p < 0.05$ ; \*\*  $p < 0.01$ ; \*\*\*  $p < 0.001$ . Data were expressed as mean  $\pm$  SEM (n = 3 in each group).

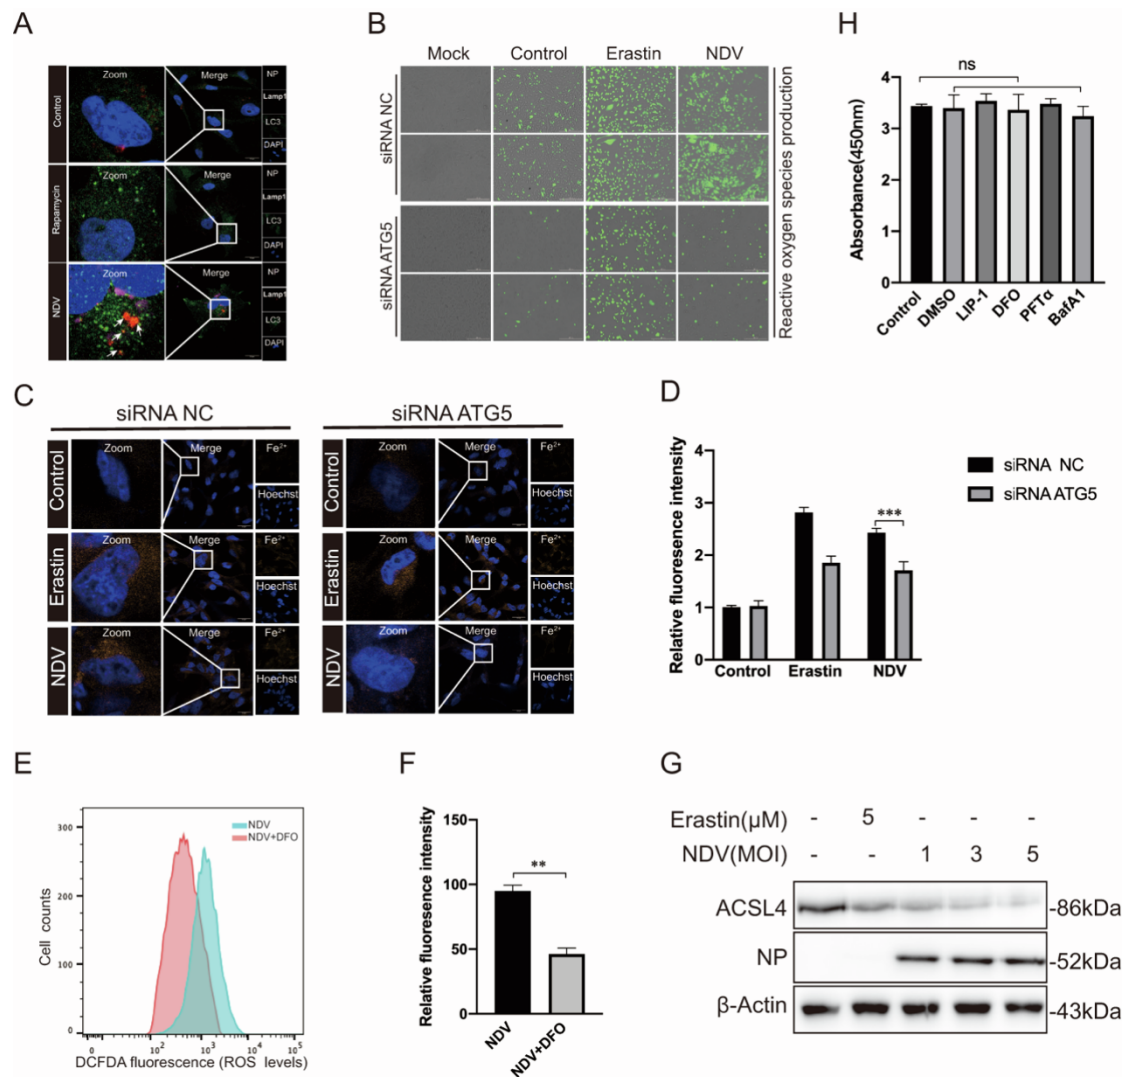

**S2 Fig. Ferroptosis induced by NDV depends on ferritinophagy. Related to Figure 4.**

(A) Fluorescence microscopy was used to assess the ability of NDV to induce the formation of autolysosomes. Staining with Lamp1 (red), and LC3 (green) in U251 cells. Scale bars = 20  $\mu$ m.

(B) Intracellular ROS production in Atg5-knockdown U251 cells treated with or without erastin and NDV was determined with the fluorescent probe Liperfluor (Green). Scale bars = 200  $\mu$ m.

(C, D) Expression level of ferrous iron was observed with fluorescence microscopy in Atg5-knockdown cells. Erastin was used as a ferroptosis inducer. Scale bars = 20  $\mu$ m.

(E, F) Analysis of intracellular ROS levels in U251 cells treated with DFO, using DCFDA staining and flow cytometry.

(G) Western blotting analysis of the expression levels of ACSL4 in NDV-infected U251 cells.

(H) Cellular toxicity analysis of LIP-1, DFO, Baf-A1, and PFT $\alpha$  in U251 cells.

Significance was analyzed using a two-tailed Student's t-test. \*  $p < 0.05$ ; \*\*  $p < 0.01$ ; \*\*\*  $p < 0.001$ . Data were expressed as mean  $\pm$  SEM (n = 3 in each group).
